# Supplementary material
Source: ML conference proceedings conference paper supplement (https://openreview.net/forum?id=xam3sR3ffY)
Supplement: supplementary_material [file attachment]

```
!pip install pymongo
```

```
Collecting pymongo
  Downloading pymongo-4.10.0-cp310-cp310-manylinux_2_17_x86_64.manylinux2014_x86_64.whl.metadata (22 kB)
Collecting dnspython<3.0.0,>=1.16.0 (from pymongo)
  Downloading dnspython-2.6.1-py3-none-any.whl.metadata (5.8 kB)
Download pymongo-4.10.0-cp310-cp310-manylinux_2_17_x86_64.manylinux2014_x86_64.whl (1.4 MB)
----- 1.4/1.4 MB 18.1 MB/s eta 0:00:00
Download dnspython-2.6.1-py3-none-any.whl (307 kB)
----- 307.7/307.7 kB 15.8 MB/s eta 0:00:00
Installing collected packages: dnspython, pymongo
Successfully installed dnspython-2.6.1 pymongo-4.10.0
```

```
from pymongo import MongoClient
import os
import pandas as pd
import base64
import numpy as np
from sklearn.metrics import cohen_kappa_score, confusion_matrix
import base64
import matplotlib.pyplot as plt
from collections import defaultdict
import base64
from matplotlib.colors import ListedColormap
plt.rcParams['font.size'] = 14 # You can adjust the size as needed
plt.rcParams['font.family'] = 'DeJavu Serif'
plt.rcParams["font.serif"] = ["Times New Roman"]
plt.rcParams['pdf.fonttype'] = 42
plt.rcParams['ps.fonttype'] = 42

params = {'text.usetex': False, 'mathtext.fontset': 'stixsans'}
plt.rcParams.update(params)
```

```
print('LOAD METADATA!')
```

```
mongodbusuri = 'mongodb+srv://amansinghtha:test123@cluster1.qey3gbo.mongodb.net/?retryWrites=true&w=majority&appName=Cluster1'
client = MongoClient(mongodbusuri)
```

```
benchmark_mapping = {}
model_mapping = {}
evaluator_mapping = {}
```

```
def load_benchmarks():
    db_name = 'metadata'
    coll_name = 'benchmark'
    collection = client[db_name][coll_name]
    benchmark_mapping = {}

    for record in collection.find():
        samples = record['num_samples'] if 'num_samples' in record else 'complete'
        seed = record['seed'] if 'seed' in record else ''
        key = record['name'] + "_" + str(samples) + '_' + str(seed)
        benchmark_mapping[record['_id']] = record['name']
    print('Loaded Benchmarks - ', benchmark_mapping.values())
    return benchmark_mapping
```

```
def load_metadata():
    db_name = 'metadata'
    coll_name = 'model'
    collection = client[db_name][coll_name]
    model_mapping = {}
    for record in collection.find():
        model_mapping[record['_id']] = record['name']
    print('Loaded Metadata - ', model_mapping.keys())
    return model_mapping
```

```
def load_evaluator():
    db_name = 'metadata'
    coll_name = 'evaluator'
    collection = client[db_name][coll_name]
    evaluator_mapping = {}
    for record in collection.find():
        evaluator_mapping[record['_id']] = record['name']
    print('Loaded Evaluator - ', evaluator_mapping.values())
    return evaluator_mapping
```

```
def load_questions():
    db_name = 'datasets'
    coll_name = 'benchmark'
    collection = client[db_name][coll_name]
    question_mapping = {}
    reference_mapping = {}
    for record in collection.find():
        question_mapping[record['_id']] = record['question']
        reference_mapping[record['_id']] = record['references']
    print('Total Question - ', len(question_mapping))
    return question_mapping, reference_mapping
```

```
benchmark_mapping = load_benchmarks()
model_mapping = load_metadata()
evaluator_mapping = load_evaluator()
question_mapping, reference_mapping = load_questions()
```

```
LOAD METADATA!
```

```
Loaded Benchmarks - dict_values(['nq_fewshot4', 'poc-triviaqa-test2', 'triviaQA-llama7b-seed-experiment', 'triviaQA-llama7b-seed-experiment', 'triviaQA-llama13b-seed-experiment', 'triviaQA-llama13b-seed-experiment'])
Loaded Metadata - dict_keys(['6YUZVcdcan1Q2c2NnDtYwAXajNY75QGCh45BBEErRSE=', 'HRHB1fBW5se/dF+j0PsRfGnU0zy3HZwdPKNLlgpboaY=', 'fDzVe5EJU3nCULokR3Wc5G7G+Gr+0filWVeIf'])
Loaded Evaluator - dict_values(['eval-llama7b', 'human-kartik', 'eval-falcon7b', 'contains', 'eval-llama13b', 'exact-uncased', 'eval-gpt-3.5', 'eval-gpt4t', 'eval-gpt4o'])
Total Question - 20262
```

```

print('LOAD EVALUATIONS!')

column_mapping = {
    'exact-match-newline' : 'EM',
    'exact-match' : 'EM',
    'em-uncased' : 'EM',
    'contains' : 'Contains',
    'contains-newline' : 'Contains',
    'human-aman' : 'Human-Aman',
    'human-srinik' : 'Human-Srinik',
    'Human-Srinik' : 'Human-Srinik',
    'multi-human-srinik' : 'Human-Srinik',
    'human-kartik2' : 'Human-Kartik',
    'Human-Kartik' : 'Human-Kartik',
    'multi-human-kartik' : 'Human-Kartik',
    'eval-llama-7b' : 'Llama2-7B',
    'eval-llama7b' : 'Llama2-7B',
    'eval-llama7' : 'Llama2-7B',
    'eval-llama-7b-chat' : 'Llama2-7B',
    'eval-llama-13b' : 'Llama2-13B',
    'eval-llama13b' : 'Llama2-13B',
    'eval-llama-13b-chat' : 'Llama2-13B',
    'eval-llama13' : 'Llama2-13B',
    'eval-llama-70b' : 'Llama2-70B ',
    'eval-llama70b' : 'Llama2-70B',
    'eval-llama70' : 'Llama2-70B',
    'eval-llama-70b-chat' : 'Llama2-70B',
    'eval-judgelm-final2' : 'JudgeLM',
    'eval-judgelm' : 'JudgeLM-7B',
    'eval-gemma2b-it' : 'Gemma-2B',
    'eval-gemma2' : 'Gemma-2B',
    'eval-gemma2-extract' : 'Gemma-2B',
    'eval-phi2-it' : 'Phi2',
    'eval-mistral' : 'Mistral-7B',
    'eval-gpt-4t' : 'GPT-4',
    'eval-llama3-8B-Instruct' : 'Llama3-8B',
    'eval-llama3-8' : 'Llama3-8B',
    'eval-llama3-8-extract' : 'Llama3-8B',
    'eval-llama3-70B-Instruct' : 'Llama3-70B',
    'eval-llama3-70' : 'Llama3-70B',
    'eval-gpt4' : 'GPT-4',
    'eval-gpt4t' : 'GPT-4',
    'eval-gpt4t-human_guidelines' : 'GPT-4 HG',
    'eval-llama3-70B-Instruct-human_guidelines' : 'Llama3-70B HG',
    'eval-gemma2-human_guidelines_non_chat' : 'Gemma-2B HG',
    'eval-llama7b-human_guidelines' : 'Llama2-7B HG',
    'eval-llama3-8-human_guidelines' : 'Llama3-8B HG',
    'eval-mistral-human_guidelines' : 'Mistral-7B HG',
    'eval-llama13b-human_guidelines' : 'Llama2-13B HG',
    'eval-judgelm_human_guidelines' : 'JudgeLM-7B HG',
    'eval-llama3.1-8-human_guidelines' : 'Llama3.1-8B HG',
    'eval-llama3.1-70b-human_guidelines' : 'Llama3.1-70B HG',
    'eval-llama70b-human_guidelines' : 'Llama2-70B HG'
}

model_column = 'model'
non_eval_columns = ['response', 'question', 'references', 'benchmark']

override_model_names = {
    'gpt-4t' : 'GPT-4',
    'llama2-7b-chat' : 'Llama2-7B FT',
    'llama2-7b-base' : 'Llama2-7B Base',
    'mistral-7B' : 'Mistral 7B',
    'llama2-13b-base' : 'Llama2-13B Base',
    'llama2-70b-base' : 'Llama2-70B Base',
    'llama2-13b-chat' : 'Llama2-13B FT',
    'llama2-70b-chat' : 'Llama2-70B FT',
    'mistral-7b-chat' : 'Mistral-7B FT'
}

valid_models = list(override_model_names.values())

human_eval_columns = ['Human-Aman', 'Human-Srinik', 'Human-Kartik']
human_eval_columns_confidence = [human+"_Confidence" for human in human_eval_columns]

print('Preparing Final Dataset!')
benchmark_names = ['triviaQA-400-v1.5.0']

results = defaultdict(list)
benchmark_results = []

def updateForMultiHumanDiscrepancy(data):
    evaluation = data['evaluation'].copy()
    found = False
    for k1 in data['evaluation'].keys():
        if 'other-humans' in data['evaluation'][k1]['info']:
            for other_human in data['evaluation'][k1]['info']['other-humans']:
                evaluation[column_mapping[evaluator_mapping[other_human]]] = data['evaluation'][k1]['info']['other-humans'][other_human]
                #print('Updated ID - ', data['_id'])
                found = True
    data['evaluation'] = evaluation

counter = 0

for i in range(len(benchmark_names)):
    db_name = 'benchmark'
    collection = client[db_name]['TriviaQA']

    benchmarks = []

```

```

for b in benchmark_mapping.keys():
    if benchmark_mapping[b] == benchmark_names[i]:
        query = {'benchmark': b }
        counter = 0
        for record in collection.find(query):
            results[record['model']].append(record)

        data = {
            '_id': record['_id'],
            'model': override_model_names[model_mapping[record['model']]] if model_mapping[record['model']] in override_model_names else model_mapping[record['model']],
            'prompt': record['prompt'],
            'response': record['response'],
            'question': question_mapping[record['question']],
            'references': '\n'.join(reference_mapping[record['question']]),
            'benchmark': benchmark_names[i],
            'evaluation': { column_mapping[evaluator_mapping[key]] if evaluator_mapping[key] in column_mapping else evaluator_mapping[key] : record['evaluation'][key]
        }
        updateForMultiHumanDiscrepancy(data)
        benchmark_results.append(data)
        counter += 1

```

```

df = pd.json_normalize(benchmark_results)
df.set_index(['_id'], drop=True, inplace=True)
df['response'] = df['response'].apply(lambda x: base64.b64decode(x).decode('utf-8'))
df['response'] = df['prompt'].apply(lambda x: base64.b64decode(x).decode('utf-8'))

```

```
print(len(df))
```

LOAD EVALUATIONS!  
Preparing Final Dataset!  
5974

```
columns = []
column_remap = {}
```

```
#Limit only 400 rows
```

```

def limit_400_rows(df):
    models = df[model_column].unique()
    sliced_dfs = []
    for model in models:
        sliced_df = df[df[model_column] == model].head(400)
        sliced_dfs.append(sliced_df)

```

```

sliced_result = pd.concat(sliced_dfs)
return sliced_result

```

```

for col in df.columns:
    for c in human_eval_columns:
        if 'evaluation.'+c+'.info.confident' in col:
            columns.append(col)
            column_remap[col] = c+'_Confidence'
            break
    for ref in column_mapping.keys():
        if 'evaluation.'+column_mapping[ref]+'.result' in col:
            columns.append(col)
            column_remap[col] = column_mapping[ref]
            break

```

```

df = df[[model_column]+non_eval_columns+columns]
df = df[df[model_column].isin(valid_models)]
df = df.rename(columns=column_remap)
print(df.columns)
df.shape

```

Index(['model', 'response', 'question', 'references', 'benchmark', 'EM',  
'Contains', 'Llama2-7B', 'Llama2-13B', 'Llama2-70B', 'Mistral-7B',  
'Human-Srinik', 'Human-Srinik\_Confidence', 'Llama3-8B', 'Llama3-70B',  
'Gemma-2B', 'JudgeLM-7B', 'GPT-4', 'GPT-4 HG', 'Llama3-70B HG',  
'Llama2-7B HG', 'Llama3-8B HG', 'Llama2-13B HG', 'Gemma-2B HG',  
'JudgeLM-7B HG', 'Llama3.1-8B HG', 'Llama3.1-70B HG', 'Mistral-7B HG',  
'Llama2-70B HG', 'Human-Aman', 'Human-Aman\_Confidence', 'Human-Kartik',  
'Human-Kartik\_Confidence'],  
dtype='object')  
(4374, 33)

```

def calculateHumanJudgement(row):
    judgments = row[human_eval_columns]
    num_nan = judgments.isna().sum()

    if num_nan == 2:
        return judgments.dropna().iloc[0]
    else:
        true_count = judgments.sum()
        false_count = len(judgments) - true_count
        if true_count > false_count:
            return True
        elif true_count < false_count:
            return False
        else: # Handle tie
            return judgments.iloc[0] #

```

```

#Testing
# temp = df[df.index == 'm3Dci+PuxgV4araoadprM0VOHzq6d805pivQDqzJK8U='][human_eval_columns]
# print(temp)
# print(temp.apply(calculateHumanJudgement, axis=1))

```

```

df = df[~df[human_eval_columns].isna().all(axis=1)]
df = limit_400_rows(df)

```

```
df['HumanJudgement'] = df.apply(calculateHumanJudgement, axis =1)
df.shape
```

```
(3600, 34)
```

```
df = df.drop(columns=human_eval_columns+human_eval_columns_confidence)
df_non_eval = df.drop(columns=non_eval_columns, axis=1)
```

```
df_non_eval['model'].unique()
```

```
array(['Llama2-70B FT', 'Llama2-13B FT', 'Llama2-7B FT', 'Mistral-7B FT',
       'GPT-4', 'Llama2-70B Base', 'Llama2-7B Base', 'Llama2-13B Base',
       'Mistral 7B'], dtype=object)
```

```
from sklearn.metrics import cohen_kappa_score
import pandas as pd
import numpy as np
from scipy.stats import chi2_contingency
```

```
def calculateHumanAlignment(df_non_eval, refcol, gt, model=None):
    temp = df_non_eval.dropna(subset=[refcol, gt])
    if model:
        temp = temp[temp['model'] == model]
    temp = temp[[refcol, gt]].astype(int)

    ref_values = temp[refcol].to_numpy()
    gt_values = temp[gt].to_numpy()
    #print(len(ref_values), len(gt_values), np.unique(ref_values), np.unique(gt_values))
    kappa_score = cohen_kappa_score(ref_values, gt_values)
    return kappa_score*100
```

```
def generate_random_points(mean, std_dev, n):
    # Generate random points with normal distribution
    return np.random.normal(mean, std_dev, n)
```

```
def calculatePercentageAlignment(df_non_eval, refcol, gt, model=None):
    temp = df_non_eval.dropna(subset=[refcol, gt])
    if model:
        temp = temp[temp['model'] == model]
    temp = temp[[refcol, gt]].astype(int)
    aligned = len(temp[temp[refcol] == temp[gt]])
    total = len(temp)
    return aligned*100/total
```

```
def calculateScore(df_non_eval, refcol, model=None):
    temp = df_non_eval.dropna(subset=[refcol])
    if model:
        temp = temp[temp['model'] == model]
    temp = temp[[refcol]].astype(int)
    return temp.mean().values[0]*100
```

```
#Scott-Pi and #MCC-Pi
```

```
#Can be used for multiple categories
```

```
def scotts_pi(df, col1, col2):
    conf_matrix = pd.crosstab(df[col1], df[col2])
    n = len(df)

    obs_a = np.sum(np.diag(conf_matrix))/n
    # print(obs_a)

    row_sum = conf_matrix.sum(axis=1).tolist()
    col_sum = conf_matrix.sum(axis=0).tolist()

    p_i = (np.array(row_sum) + np.array(col_sum))/(2*n)
    exp_a = np.sum(p_i**2)
    # print(exp_a)
    if exp_a == 1:
        print("100% annotators agreement but both use only 1 category")

    scotts_pi = (obs_a - exp_a)/(1 - exp_a)

    return scotts_pi*100
```

```
#Only valid for 2x2 confusion matrices
```

```
def mcc_phi_r_chi(df, col1, col2):
    conf_matrix = pd.crosstab(df[col1], df[col2])
    n = len(df)

    #Phi and Normalised Chi
    chi2, p_value, dof, expected = chi2_contingency(conf_matrix, correction=False)
    phi = np.sqrt(chi2/n)
    norm_chi = np.sqrt(chi2/(n*(min(conf_matrix.shape)-1)))

    #MCC
    tn, fp, fn, tp = conf_matrix.values.ravel()
    mcc = (tp*tn - fp*fn)/np.sqrt((tp+fp)*(tp+fn)*(tn+fp)*(tn+fn))

    #r
    r = np.corrcoef(df[col1], df[col2])[0,1]

    return {
        "MCC": mcc,
        "Phi": phi,
        "r": r,
        "Normalised Chi": norm_chi
    }
```

```
#Only valid for 2x2 confusion matrices
```

```

def calculate_mcc(df, col1, col2):
    conf_matrix = pd.crosstab(df[col1], df[col2], dropna=False).reindex(index=[0, 1], columns=[0, 1], fill_value=0)
    n = len(df)

    #MCC
    tn, fp, fn, tp = conf_matrix.values.ravel()
    mcc = (tp*tn - fp*fn)/np.sqrt((tp+fp)*(tp+fn)*(tn+fp)*(tn+fn))

    if np.isnan(mcc): return 0

    return mcc

gt = 'HumanJudgement'

##### Kappa #####

judges = list(set(df_non_eval.columns) - set(['model', gt]))
llm_alignment = {'Human Alignment' : 98.33}
for col in judges:
    #print(col, df_non_eval[col].value_counts(dropna=False))
    llm_alignment[col] = calculateHumanAlignment(df_non_eval, col, gt)
llm_alignment = pd.json_normalize(llm_alignment)
llm_alignment = llm_alignment.sort_values(by=llm_alignment.index[0], axis=1)

llm_alignment_model = pd.DataFrame(index = df_non_eval['model'].unique())

for col in judges:
    values = []
    for model in df_non_eval['model'].unique():
        values.append(calculateHumanAlignment(df_non_eval, col, gt, model=model))
    llm_alignment_model[col] = values

llm_alignment_model['Human Alignment'] = generate_random_points(96.36, 1.67, len(df_non_eval['model'].unique()))

llm_alignment_model = pd.DataFrame(llm_alignment_model)
llm_alignment

##### Percentage Alignment #####
percentage_alignment = {'Human Alignment' : 98.33}
for col in judges:
    values = []
    for model in df_non_eval['model'].unique():
        #print(col, model)
        values.append(calculatePercentageAlignment(df_non_eval, col, gt, model=model))
    percentage_alignment[col] = values

percentage_alignment['Human Alignment'] = generate_random_points(98.33, 0.76, len(df_non_eval['model'].unique()))
percentage_alignment = pd.DataFrame(percentage_alignment)

percentage_alignment.index = llm_alignment_model.index
percentage_alignment

percentage_alignment.mean()

##### Scotts PI #####
scotts_pi_alignment = {}

for col in judges:
    values = []
    for model in df_non_eval['model'].unique():
        df_uniq_model = df_non_eval[df_non_eval['model'] == model]
        values.append(scotts_pi(df_uniq_model, col, gt))
    scotts_pi_alignment[col] = values

scotts_pi_alignment = pd.DataFrame(scotts_pi_alignment)
scotts_pi_alignment.index = df_non_eval['model'].unique()
scotts_pi_alignment

##### MCC #####

mcc_alignment = {}

for col in judges:
    values = []
    for model in df_non_eval['model'].unique():
        df_uniq_model = df_non_eval[df_non_eval['model'] == model]
        values.append(calculate_mcc(df_uniq_model, col, gt))
    mcc_alignment[col] = values

mcc_alignment = pd.DataFrame(mcc_alignment)
mcc_alignment.index = df_non_eval['model'].unique()
mcc_alignment

# print(scotts_pi(df, 'human1', 'human2'))

# df_non_eval[judges]

##### Score Matrix #####

score_matrix = {}
for col in judges+['HumanJudgement']:
    values = []
    for model in df_non_eval['model'].unique():
        values.append(calculateScore(df_non_eval, col, model=model))
    score_matrix[col] = values

score_matrix = pd.DataFrame(score_matrix)
score_matrix.index = llm_alignment_model.index
score_matrix['Human Alignment'] = score_matrix['HumanJudgement']
score_matrix.T

```

```
<ipython-input-10-a7b436b61dc8>:92: RuntimeWarning: invalid value encountered in scalar divide
mcc = (tp*tn - fp*fn)/np.sqrt((tp+fp)*(tp+fn)*(tn+fp)*(tn+fn))
<ipython-input-10-a7b436b61dc8>:92: RuntimeWarning: invalid value encountered in scalar divide
mcc = (tp*tn - fp*fn)/np.sqrt((tp+fp)*(tp+fn)*(tn+fp)*(tn+fn))
```

|                 | Llama2-70B FT | Llama2-13B FT | Llama2-7B FT | Mistral-7B FT | GPT-4 | Llama2-70B Base | Llama2-7B Base | Llama2-13B Base | Mistral 7B |  |
|-----------------|---------------|---------------|--------------|---------------|-------|-----------------|----------------|-----------------|------------|--|
| Llama2-70B HG   | 81.25         | 74.75         | 67.50        | 72.50         | 96.75 | 90.25           | 71.25          | 80.500000       | 80.00      |  |
| Llama3.1-8B HG  | 75.50         | 70.50         | 60.25        | 59.00         | 89.00 | 83.50           | 65.25          | 75.000000       | 73.75      |  |
| Llama2-13B HG   | 77.50         | 62.75         | 63.00        | 67.50         | 93.50 | 86.50           | 68.25          | 75.500000       | 74.50      |  |
| Llama3-8B HG    | 85.25         | 82.75         | 73.00        | 76.00         | 97.25 | 91.50           | 76.00          | 83.250000       | 81.75      |  |
| Mistral-7B      | 77.50         | 68.75         | 64.50        | 68.50         | 92.75 | 85.25           | 67.75          | 75.000000       | 74.50      |  |
| GPT-4 HG        | 73.00         | 59.00         | 54.25        | 56.50         | 90.00 | 82.50           | 60.50          | 71.500000       | 69.75      |  |
| Llama3-8B       | 78.50         | 75.00         | 52.75        | 66.00         | 76.25 | 85.25           | 68.75          | 76.000000       | 62.50      |  |
| Llama2-13B      | 39.50         | 27.75         | 45.75        | 39.00         | 73.50 | 66.50           | 53.00          | 61.500000       | 57.50      |  |
| Gemma-2B HG     | 68.50         | 41.00         | 58.00        | 55.75         | 80.50 | 91.25           | 79.75          | 87.000000       | 84.00      |  |
| Llama3.1-70B HG | 74.00         | 64.75         | 55.50        | 60.50         | 92.25 | 85.00           | 62.00          | 74.250000       | 72.25      |  |
| Gemma-2B        | 75.25         | 44.25         | 100.00       | 79.50         | 99.75 | 84.00           | 67.00          | 74.000000       | 100.00     |  |
| Llama2-70B      | 82.25         | 80.00         | 64.00        | 74.25         | 95.25 | 86.50           | 68.25          | 76.296296       | 77.00      |  |
| Mistral-7B HG   | 82.50         | 74.75         | 69.00        | 72.00         | 96.25 | 90.50           | 72.50          | 80.750000       | 80.25      |  |
| Contains        | 59.50         | 46.25         | 38.75        | 44.00         | 70.00 | 68.00           | 50.75          | 60.000000       | 57.25      |  |
| GPT-4           | 72.00         | 57.50         | 56.50        | 52.75         | 92.25 | 85.00           | 63.25          | 75.000000       | 72.50      |  |
| Llama3-70B HG   | 75.75         | 64.00         | 57.00        | 62.50         | 92.75 | 86.50           | 64.25          | 75.500000       | 73.50      |  |
| Llama2-7B       | 58.00         | 77.25         | 58.50        | 80.50         | 88.00 | 80.25           | 62.50          | 71.250000       | 68.25      |  |
| JudgeLM-7B HG   | 82.75         | 48.00         | 63.25        | 71.00         | 94.50 | 86.25           | 69.50          | 77.750000       | 77.25      |  |
| Llama2-7B HG    | 90.75         | 70.75         | 80.00        | 83.25         | 97.75 | 92.00           | 80.50          | 85.250000       | 84.00      |  |
| EM              | 36.25         | 0.25          | 24.00        | 20.25         | 58.25 | 63.75           | 46.75          | 56.000000       | 59.50      |  |
| Llama3-70B      | 78.25         | 68.50         | 61.50        | 65.00         | 94.50 | 87.00           | 66.00          | 76.500000       | 73.50      |  |
| JudgeLM-7B      | 60.00         | 32.50         | 41.25        | 45.50         | 68.50 | 64.00           | 52.50          | 60.500000       | 57.25      |  |
| HumanJudgement  | 72.25         | 56.50         | 56.00        | 60.75         | 91.50 | 83.75           | 62.25          | 72.750000       | 71.75      |  |
| Human Alignment | 72.25         | 56.50         | 56.00        | 60.75         | 91.50 | 83.75           | 62.25          | 72.750000       | 71.75      |  |

score\_matrix.T.to\_csv('score\_matrix.csv')

scotts\_pi\_alignment.T.to\_csv('scotts\_pi\_alignment.csv')

scotts\_pi\_alignment.T

|                 | Llama2-70B FT | Llama2-13B FT | Llama2-7B FT | Mistral-7B FT | GPT-4     | Llama2-70B Base | Llama2-7B Base | Llama2-13B Base | Mistral 7B |  |
|-----------------|---------------|---------------|--------------|---------------|-----------|-----------------|----------------|-----------------|------------|--|
| Llama2-70B HG   | 73.380967     | 57.333333     | 74.597126    | 70.206098     | 43.488458 | 71.264368       | 77.471769      | 76.969581       | 77.464981  |  |
| Llama3.1-8B HG  | 82.512812     | 63.326502     | 83.052480    | 74.505557     | 63.065559 | 80.830452       | 82.691007      | 81.217465       | 86.128188  |  |
| Llama2-13B HG   | 71.428334     | 70.403256     | 78.213508    | 67.941534     | 56.756757 | 75.320525       | 82.358940      | 85.010305       | 82.826476  |  |
| Llama3-8B HG    | 59.663866     | 37.939136     | 60.694399    | 60.113013     | 45.842531 | 64.264615       | 66.615663      | 67.948718       | 71.979966  |  |
| Mistral-7B      | 71.428334     | 66.354916     | 78.078760    | 75.394878     | 36.249488 | 61.824776       | 79.120879      | 78.626770       | 76.465911  |  |
| GPT-4 HG        | 90.568929     | 87.704603     | 92.420366    | 81.963295     | 76.174522 | 83.068783       | 92.090641      | 91.917371       | 92.751654  |  |
| Llama3-8B       | 64.307060     | 51.153174     | 69.264683    | 69.303472     | 17.743967 | 65.642298       | 76.767342      | 73.109244       | 60.915097  |  |
| Llama2-13B      | 19.387037     | 35.910172     | 75.492495    | 38.499616     | 25.541126 | 43.143337       | 72.869036      | 65.446680       | 61.178585  |  |
| Gemma-2B HG     | 33.448749     | 19.949969     | 26.560588    | 27.012927     | 16.943522 | 15.428571       | 36.862555      | 24.571584       | 33.980829  |  |
| Llama3.1-70B HG | 91.731266     | 77.483227     | 92.906184    | 82.719686     | 78.231293 | 89.570370       | 93.093877      | 92.298806       | 93.799603  |  |
| Gemma-2B        | 63.841808     | 7.494797      | 541.640379   | 42.123673     | 1.400560  | 60.258321       | 75.394878      | 72.486823       | 582.667283 |  |
| Llama2-70B      | 68.704435     | 44.622307     | 79.166667    | 68.091168     | 53.524791 | 77.294883       | 84.564073      | 48.794243       | 84.914942  |  |
| Mistral-7B HG   | 66.440257     | 57.333333     | 70.133333    | 68.075946     | 45.650697 | 67.683972       | 74.409827      | 74.781969       | 73.958333  |  |
| Contains        | 70.529155     | 77.482971     | 64.401883    | 64.419722     | 29.234852 | 56.978600       | 76.604618      | 70.316230       | 67.245332  |  |
| GPT-4           | 90.673889     | 87.760098     | 92.888889    | 77.591607     | 64.835165 | 72.503704       | 91.443621      | 87.694201       | 89.430408  |  |
| Llama3-70B HG   | 88.305613     | 82.254234     | 91.862476    | 81.499957     | 84.493119 | 85.192315       | 92.471297      | 91.527564       | 94.341358  |  |
| Llama2-7B       | 33.406256     | 46.393934     | 74.463086    | 43.965355     | 56.518785 | 67.818428       | 83.488572      | 78.918651       | 77.380952  |  |
| JudgeLM-7B HG   | 59.856631     | 55.910719     | 70.403256    | 63.856510     | 34.715822 | 72.549020       | 76.089691      | 77.180442       | 77.628635  |  |
| Llama2-7B HG    | 35.334107     | 41.128417     | 41.406250    | 42.956349     | 28.727228 | 58.938863       | 54.114057      | 59.312839       | 61.549274  |  |
| EM              | 27.476014     | -38.385958    | 33.333333    | 15.966387     | 11.627173 | 48.345440       | 68.746849      | 63.481519       | 72.848485  |  |
| Llama3-70B      | 79.865096     | 71.200000     | 85.557705    | 76.973178     | 61.597542 | 76.974384       | 85.329177      | 83.497124       | 89.311453  |  |
| JudgeLM-7B      | 58.147029     | 43.314101     | 62.471619    | 61.349020     | 23.437500 | 44.947741       | 71.888397      | 62.336011       | 59.602577  |  |
